# Supplementary material for: Polydopamine assists the continuous growth of zeolitic imidazolate framework-8 on electrospun polyacrylonitrile fibers as efficient adsorbents for the improved removal of Cr(vi)
Source: Royal Society of Chemistry journal article supplement (doi:10.1039/d1nj03080a), 2021-01-01
Supplement: d1nj03080a1.pdf [file d1nj03080a1.pdf]

## Supplementary Information

### **Polydopamine assisting the continuous growth of zeolitic imidazolate framework-8 on electrospun polyacrylonitrile fibers as efficient adsorbent for improved removal of Cr(VI)**

Xu Yang,<sup>a,b</sup> Yuhong Zhou,<sup>b</sup> Zhaojie Sun,<sup>b</sup> Chunhui Yang<sup>b</sup> and Dongyan Tang<sup>\*a,b</sup>

*<sup>a</sup>State Key Laboratory of Urban Water Resource and Environment, Harbin Institute of Technology, Harbin 150001,*

*<sup>b</sup>School of Chemistry and Chemical Engineering, Harbin Institute of Technology, Harbin 150001, China.*

\* Corresponding author

*E-mail address:* [dytang@hit.edu.cn](mailto:dytang@hit.edu.cn) (D. Tang)

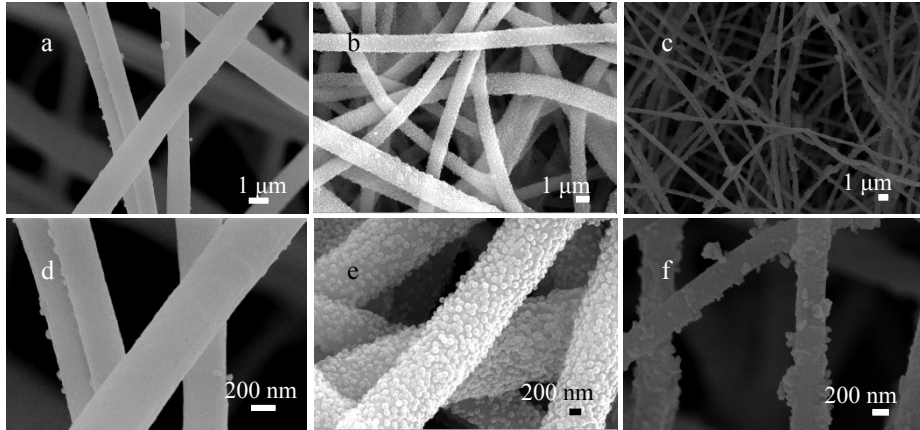

Fig. S1 SEM images showing the morphologies of (a and d) PAN/PDA fibers, (b and e) ZIF-8@PDA/PAN fibers, (e and f) PAN@ZIF-8 fibers. Images were taken at relatively lower (a-c) and higher (d-f) magnifications.

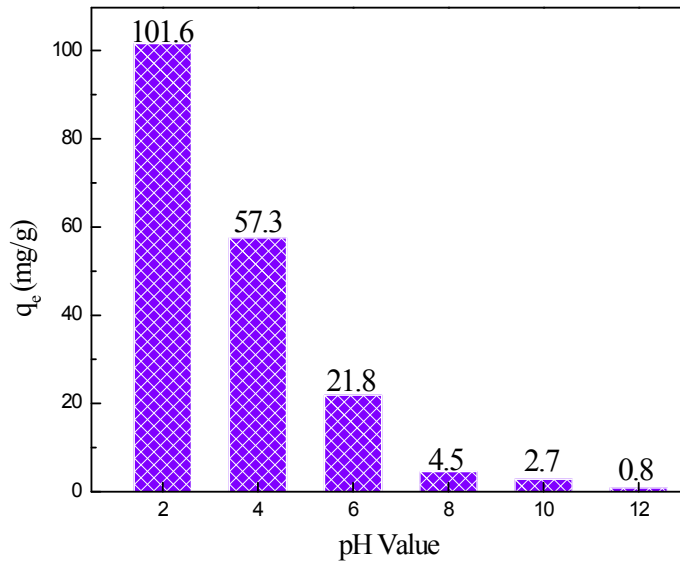

Fig. S2 The effects of pH values on the Cr(VI) adsorption capacity of ZIF-8@PDA/PAN fibers.

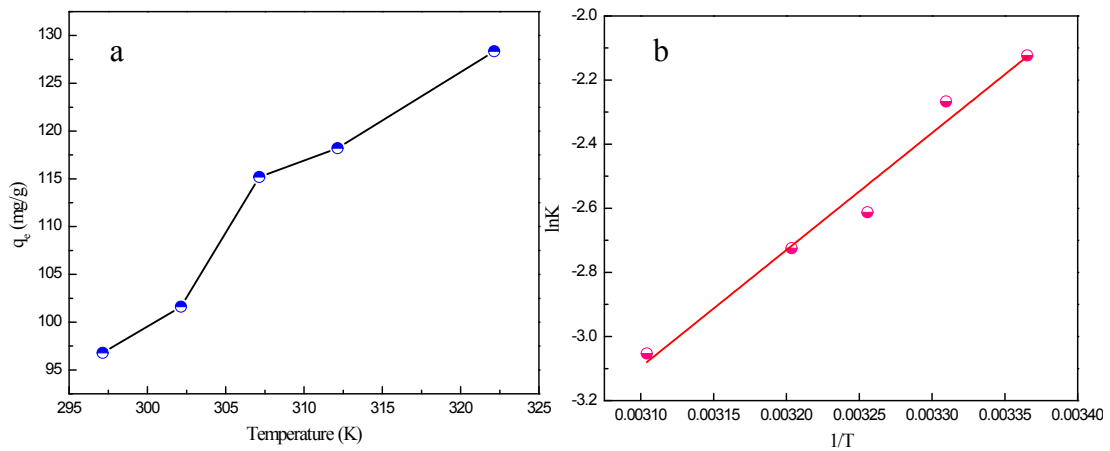

Fig.S3 (a) The variation of adsorption amounts of Cr (VI) onto ZIF-8@PDA/PAN fibers with the increased temperatures; (b) the plot of  $\ln K$  versus  $1/T$  to determine the thermodynamic parameters

Table S1 The calculated thermodynamic parameters of ZIF-8@PDA/PAN fibers with the adsorption to Cr(VI)

|          |          | $\Delta G^0$ (kJ·mol <sup>-1</sup> ) |          |          |  |                                          | $\Delta H^0$                            | $\Delta S^0$ |
|----------|----------|--------------------------------------|----------|----------|--|------------------------------------------|-----------------------------------------|--------------|
| 297.15 K | 302.15 K | 307.15 K                             | 312.15 K | 322.15 K |  | (kJ·mol <sup>-1</sup> ·K <sup>-1</sup> ) | (J·mol <sup>-1</sup> ·K <sup>-1</sup> ) |              |
| -2.12    | -2.26    | -2.61                                | -2.72    | -3.05    |  | 119.72                                   | 30.35                                   |              |

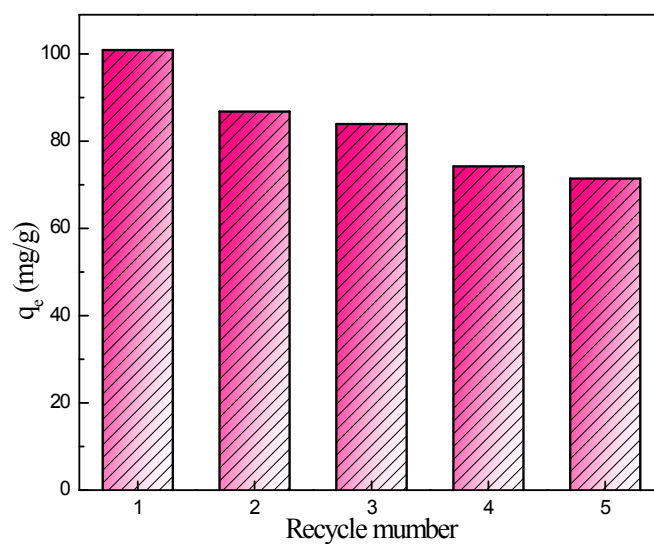

Fig. S4 The adsorption amount of ZIF-8@PDA/PAN fibers toward Cr(VI) for different recycle numbers.

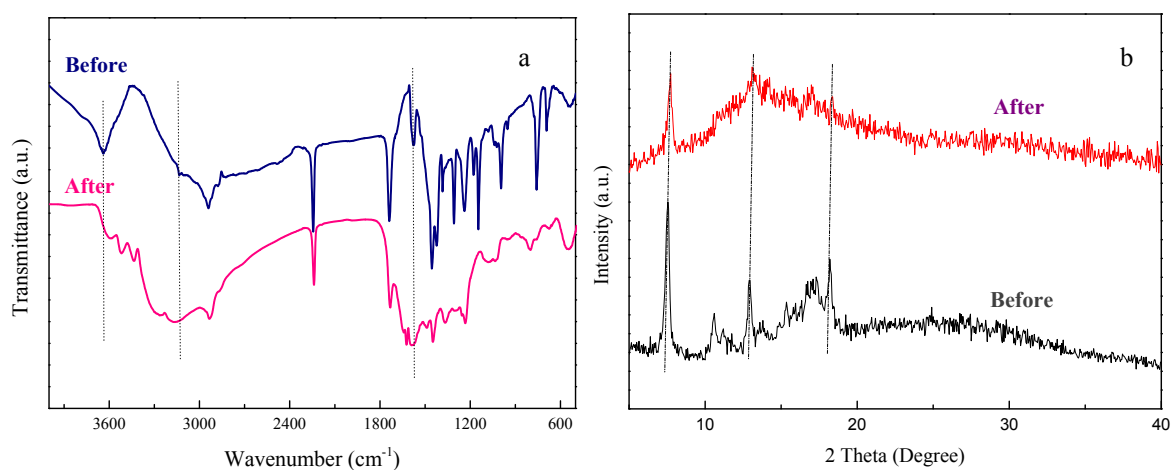

Fig. S5 (a) FT-IR spectra and (b) XRD patterns of the fresh and reused ZIF-8@PDA/PAN fibers

The thermodynamic parameters of Gibbs free energy of the adsorption ( $\Delta G^0$ ), the enthalpy of the adsorption ( $\Delta H^0$ ), and the entropy of the adsorption ( $\Delta S^0$ ) were calculated by the following equations:

$$\Delta G^0 = -RT \ln K \quad (1)$$

$$\ln K = -\frac{\Delta H^0}{RT} + \frac{\Delta S^0}{R} \quad (2)$$

where  $K$  was the equilibrium constant;  $R$  ( $8.314 \text{ J}\cdot\text{mol}^{-1}\cdot\text{K}^{-1}$ ) and  $T$  (K) were the ideal gas constant and the absolute temperature, respectively.
